# Supplementary material for: Cost-effectiveness analysis of a single-inhaler triple therapy for COPD in the UK
Source: PubMed Central journal article supplement — ERJ Open Res. 2021 Mar 22;7(1):00480-2020. doi: 10.1183/23120541.00480-2020 (PMC7983252; doi:10.1183/23120541.00480-2020), 2021-03-22
Supplement: 00480-2020.SUPPLEMENT.pdf [file 00480-2020.SUPPLEMENT.pdf]

## Supplementary Appendix

SUPPLEMENTARY FIGURE S1 QALY cost-effectiveness acceptability curves of FF/UMEC/VI versus BUD/FOR (EXT population<sup>#</sup>; PA).

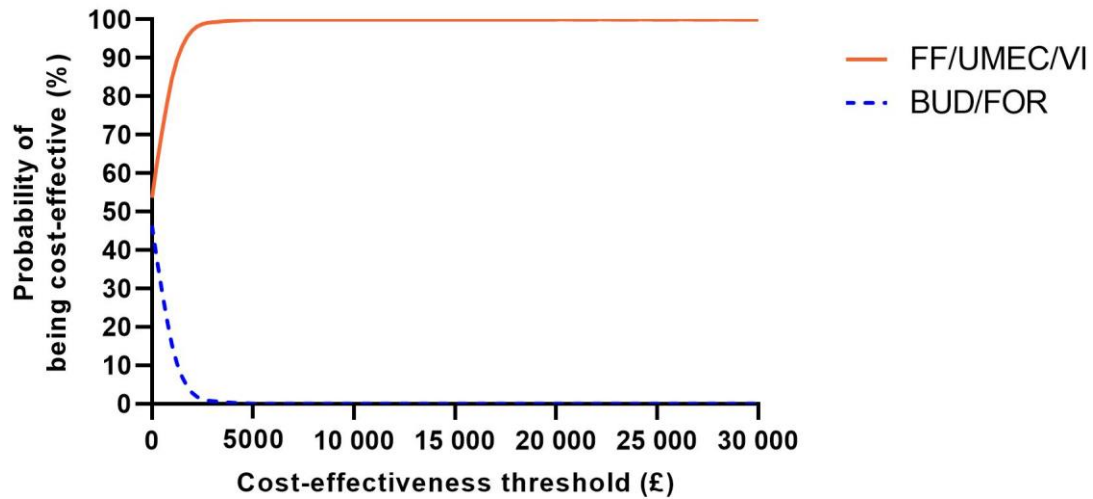

FF: fluticasone furoate; UMEC: umeclidinium; VI: vilanterol; BUD: budesonide; FOR: formoterol; PA: probabilistic analysis; QALY: quality-adjusted life year; EXT: extension. <sup>#</sup>: patients treated for up to 52 weeks.

SUPPLEMENTARY TABLE S1 Coefficients estimated within the FEV<sub>1</sub> (mL) random intercept equation fit using data from TORCH<sup>#</sup>

| Variable                                                                    | Point estimate | Standard error |
|-----------------------------------------------------------------------------|----------------|----------------|
| <b>Intercept</b>                                                            | 1275.6         | 35.9           |
| <b>Slope (years)</b>                                                        | -40.9          | 4.5            |
| <b>Recent exacerbation history*</b>                                         | -30.6          | 5.9            |
| <b>Age, years</b>                                                           |                |                |
| <55                                                                         | Referent       |                |
| 55–<65                                                                      | -203.0         | 23.6           |
| 65–<75                                                                      | -326.5         | 23.1           |
| ≥75                                                                         | -402.6         | 29.5           |
| <b>Sex</b>                                                                  |                |                |
| Male                                                                        | 293.9          | 17.1           |
| Female                                                                      | Referent       |                |
| <b>BMI, kg/m<sup>2</sup></b>                                                |                |                |
| <20                                                                         | Referent       |                |
| 20–<25                                                                      | 153.3          | 24.5           |
| 25–<29                                                                      | 244.5          | 25.4           |
| ≥29                                                                         | 348.7          | 25.9           |
| <b>Exacerbation history (moderate or severe, in the previous 12 months)</b> |                |                |
| 0                                                                           | Referent       |                |
| 1                                                                           | -0.03          | 17.7           |
| ≥2                                                                          | -55.0          | 17.4           |
| <b>Baseline SGRQ total score</b>                                            |                |                |
| <38                                                                         | Referent       |                |
| 38–<50                                                                      | -93.9          | 19.4           |
| 50–<62                                                                      | -161.1         | 20.0           |
| ≥62                                                                         | -185.9         | 20.7           |

FEV<sub>1</sub>: forced expiratory volume in 1 s; BMI: body mass index; SGRQ: St. George's Respiratory Questionnaire. <sup>#</sup>: source: Calverley *et al.*, 2007 [10] and Vestbo *et al.*, 2004 [11]; \*a recent exacerbation history is defined as an exacerbation occurring within the previous year.

SUPPLEMENTARY TABLE S2 Coefficients estimated within the exacerbation random intercept equation fit using data from TORCH<sup>#</sup>

| Variable                                                                    | Point estimate | Standard error |
|-----------------------------------------------------------------------------|----------------|----------------|
| <b>Intercept</b>                                                            | -0.96          | 0.11           |
| <b>Treatment arm<sup>¶</sup></b>                                            |                |                |
| ICS/LABA                                                                    | Referent       |                |
| Placebo                                                                     | 0.03           | 0.07           |
| ICS alone                                                                   | -0.12          | 0.07           |
| LABA alone                                                                  | 0.05           | 0.07           |
| <b>Recent exacerbation history<sup>*</sup></b>                              | 0.9            | 0.06           |
| <b>FEV<sub>1</sub> percent predicted</b>                                    |                |                |
| <30% (very severe COPD)                                                     | Referent       |                |
| 30–<50% (severe COPD)                                                       | -0.14          | 0.06           |
| 50–<80% (moderate COPD)                                                     | -0.49          | 0.08           |
| >80% (non-COPD)                                                             | -0.98          | 0.22           |
| <b>Sex</b>                                                                  |                |                |
| Male                                                                        | -0.16          |                |
| Female                                                                      | Referent       |                |
| <b>Exacerbation history (moderate or severe, in the previous 12 months)</b> |                |                |
| 0                                                                           | Referent       |                |
| 1                                                                           | 0.26           | 0.07           |
| ≥2                                                                          | 0.43           | 0.06           |
| <b>Baseline SGRQ total score</b>                                            |                |                |
| <38                                                                         | Referent       |                |
| 38–<50                                                                      | 0.20           | 0.07           |
| 50–<62                                                                      | 0.22           | 0.07           |
| ≥62                                                                         | 0.26           | 0.07           |

ICS: inhaled corticosteroid; LABA: long-acting  $\beta_2$ -agonist; FEV<sub>1</sub>: forced expiratory volume in 1 s; COPD: chronic obstructive pulmonary disease; SGRQ: St. George's Respiratory Questionnaire. <sup>#</sup>: source: Calverley *et al.*, 2007 [10] and Vestbo *et al.*, 2004 [11]; <sup>¶</sup>: it was assumed that all patients were treated with at least an ICS/LABA; <sup>\*</sup>: a recent exacerbation history is defined as an exacerbation occurring within the previous year.

SUPPLEMENTARY TABLE S3 Annual transition probabilities (based on statistical equations for FEV<sub>1</sub> decline over time)

| <b>COPD severity health state transition</b>                                | <b>Transition probability</b> |
|-----------------------------------------------------------------------------|-------------------------------|
| <b>Moderate COPD to Severe COPD<br/>(no recent exacerbation history)</b>    | 0.041                         |
| <b>Moderate COPD to Severe COPD<br/>(recent exacerbation history)</b>       | 0.088                         |
| <b>Severe COPD to Very severe COPD<br/>(no recent exacerbation history)</b> | 0.070                         |
| <b>Severe COPD to Very severe COPD<br/>(recent exacerbation history)</b>    | 0.143                         |

Moderate COPD (FEV<sub>1</sub> percent predicted 50–<80%); Severe COPD (FEV<sub>1</sub> percent predicted 30–<50%); Very severe COPD (FEV<sub>1</sub> percent predicted <30%). A recent exacerbation history is defined as an exacerbation occurring within the previous year

FEV<sub>1</sub>: forced expiratory volume in 1 s; COPD: chronic obstructive pulmonary disease.

SUPPLEMENTARY TABLE S4 Treatment effect and patient distribution across the health states defined by FEV<sub>1</sub> and exacerbation status at the end of the FULFIL trial (week 24, ITT population)

|                                                               | <b>FF/UMEC/VI versus BUD/FOR</b> |                |
|---------------------------------------------------------------|----------------------------------|----------------|
| <b>FEV<sub>1</sub> increment (mL) (mean score difference)</b> | 171 (95% CI: 148, 194)           |                |
| <b>SGRQ change (mean score difference)</b>                    | -2.2 (95% CI: -3.5, -1.0)        |                |
| <b>Moderate exacerbation reduction (RR)</b>                   | 0.79 (95% CI: 0.6, 1.04)         |                |
| <b>Severe exacerbation reduction (RR)</b>                     | 0.54 (95% CI: 0.27, 1.08)        |                |
|                                                               | <b>FF/UMEC/VI</b>                | <b>BUD/FOR</b> |
| <b>No within-trial exacerbations</b>                          |                                  |                |
| Very severe COPD<br>(FEV <sub>1</sub> percent predicted <30%) | 11.0%                            | 16.0%          |
| Severe COPD<br>(FEV <sub>1</sub> percent predicted 30–<50%)   | 38.9%                            | 45.6%          |
| Moderate COPD<br>(FEV <sub>1</sub> percent predicted 50–<80%) | 39.9%                            | 25.4%          |
| <b>With within-trial exacerbations</b>                        |                                  |                |
| Very severe COPD<br>(FEV <sub>1</sub> percent predicted <30%) | 1.5%                             | 3.9%           |
| Severe COPD<br>(FEV <sub>1</sub> percent predicted 30–<50%)   | 5.0%                             | 6.2%           |
| Moderate COPD<br>(FEV <sub>1</sub> percent predicted 50–<80%) | 3.2%                             | 2.3%           |
| <b>Deaths</b>                                                 | 0.4%                             | 0.7%           |
| <b>Mean moderate exacerbations per patient</b>                | 0.11                             | 0.15           |
| <b>Mean severe exacerbations per patient</b>                  | 0.01                             | 0.03           |
| <b>Mean pneumonia per patient</b>                             | 0.02                             | 0.01           |

FEV<sub>1</sub>: forced expiratory volume in 1 s; ITT: intent to treat; FF: fluticasone furoate; UMEC: umeclidinium; VI: vilanterol; BUD: budesonide; FOR: formoterol; CI: confidence interval; SGRQ: St. George's Respiratory Questionnaire; RR: relative risk.

## SUPPLEMENTARY TABLE S5 Summary of analysis assumptions

---

### Detail

---

The patient population in the FULFIL trial is representative of the target UK COPD population, eligible for treatment with FF/UMEC/VI

---

Treatment effect for the reduction in exacerbations with FF/UMEC/VI is limited only to the duration of the trial

---

In the Markov model, exacerbation treatment effect is incorporated indirectly as a result of the shift in FEV<sub>1</sub> percent predicted health-state distribution

---

Risk of an exacerbation increases with increasing COPD severity (defined by decreasing FEV<sub>1</sub> percent predicted), and is higher for individuals who experienced an exacerbation during the previous year

---

Of all predicted exacerbations by COPD category, it is assumed that 80% are moderate and 20% are severe

---

Treatment discontinuation only occurs within the trial period; no further discontinuation was included after the FULFIL trial duration

---

Mortality rate in the EXT population (follow-up 52 weeks) for FULFIL is unknown, thus it was assumed to occur at the same rate as the ITT population (follow-up 24 weeks)

---

Pneumonia does not have a direct impact on mortality

---

UK: United Kingdom; COPD: chronic obstructive pulmonary disease; FF: fluticasone furoate; UMEC: umecclidinium; VI: vilanterol; FEV<sub>1</sub>: forced expiratory volume in 1 s; EXT: extension; ITT: intent to treat.

SUPPLEMENTARY TABLE S6 OWSA: pre-specified upper and lower limits for pre-selected parameters, Markov model

| <b>Parameter</b>                                                                                    | <b>Base case</b> | <b>Lower limit</b> | <b>Upper limit</b> |
|-----------------------------------------------------------------------------------------------------|------------------|--------------------|--------------------|
| <b>Utility - moderate COPD (<math>\pm 20\%</math>)</b>                                              | 0.787            | 0.630              | 0.944              |
| <b>Utility - severe COPD (<math>\pm 20\%</math>)</b>                                                | 0.750            | 0.600              | 0.900              |
| <b>Utility - very severe COPD (<math>\pm 20\%</math>)</b>                                           | 0.647            | 0.518              | 0.776              |
| <b>Pneumonia disutility (<math>\pm 20\%</math>)</b>                                                 | -0.011           | -0.013             | -0.009             |
| <b>Exacerbation rates in moderate COPD - no recent exacerbation history (<math>\pm 20\%</math>)</b> | 0.299            | 0.239              | 0.359              |
| <b>Exacerbation rates in moderate COPD - recent exacerbation history (<math>\pm 20\%</math>)</b>    | 0.735            | 0.588              | 0.882              |
| <b>Exacerbation rates in very severe COPD - recent exacerbation history (<math>\pm 20\%</math>)</b> | 1.200            | 0.960              | 1.440              |
| <b>Risk of mortality in very severe COPD (<math>\pm 20\%</math>)</b>                                | 8.330            | 6.664              | 9.996              |
| <b>Discount rates</b>                                                                               | 3.5%             | 0.0%               | 5.0%               |
| <b>Cost BUD/FOR (<math>\pm 20\%</math>)</b>                                                         | £38.00           | £30.40             | £45.60             |
| <b>Cost FF/UMEC/VI (<math>\pm 20\%</math>)</b>                                                      | £49.50           | £39.60             | £59.40             |
| <b>COPD maintenance costs (<math>\pm 20\%</math>)</b>                                               |                  |                    |                    |
| Moderate COPD                                                                                       | £203             | £163               | £244               |
| Severe COPD                                                                                         | £677             | £541               | £812               |
| Very severe COPD                                                                                    | £2090            | £1672              | £2508              |

OWSA: one-way sensitivity analysis; COPD: chronic obstructive pulmonary disease; BUD: budesonide; FOR: formoterol; FF: fluticasone furoate; UMEC: umeclidinium; VI: vilanterol.

A recent exacerbation history is defined as an exacerbation occurring within the previous year

SUPPLEMENTARY TABLE S7 Distributions used in the PA

| <b>Parameter</b>                           | <b>Distribution</b> | <b>Justification</b>                                                      |
|--------------------------------------------|---------------------|---------------------------------------------------------------------------|
| <b>Patient characteristics<sup>#</sup></b> | Normal              | Assumed normally distributed in the population                            |
| <b>COPD mortality rates</b>                | Log normal          |                                                                           |
| <b>Relative risk<sup>¶</sup></b>           | Log normal          | Ratio, additive on log scale                                              |
| <b>Trial-based model probabilities</b>     | Beta/Dirichlet      | Constrained on interval of 0 to 1                                         |
| <b>Regression parameters<sup>+</sup></b>   | Multivariate normal | To capture correlation between normally distributed regression parameters |
| <b>Other unit costs</b>                    | Gamma               | Constrained on interval of 0 to positive infinity                         |
| <b>Resource-use rates</b>                  | Gamma               | Constrained on interval of 0 to positive infinity                         |
| <b>Resource-use probabilities</b>          | Beta                | Constrained on interval of 0 to 1                                         |
| <b>Health-state utilities</b>              | Beta                | Constrained on interval 0 and 1                                           |
| <b>QALY loss</b>                           | Gamma               | Constrained on interval of 0 to positive infinity                         |

PA: probabilistic analysis; COPD: chronic obstructive pulmonary disease; QALY: quality-adjusted life year; FEV<sub>1</sub>: forced expiratory volume in 1 s. <sup>#</sup>: age, height; <sup>¶</sup>: COPD mortality, exacerbations; <sup>+</sup>: FEV<sub>1</sub> decline, exacerbations.



SUPPLEMENTARY TABLE S8 Base-case results: EXT (lifetime horizon<sup>#</sup>) population and ITT subgroup populations

|                                         | EXT population <sup>#</sup> |                |              | Severe COPD or worse <sup>¶</sup> |                |             | History of exacerbations <sup>+</sup> |                |             |
|-----------------------------------------|-----------------------------|----------------|--------------|-----------------------------------|----------------|-------------|---------------------------------------|----------------|-------------|
|                                         | FF/UMEC/VI                  | BUD/FOR        | Incremental  | FF/UMEC/VI                        | BUD/FOR        | Incremental | FF/UMEC/VI                            | BUD/FOR        | Incremental |
| <b>Outcomes</b>                         |                             |                |              |                                   |                |             |                                       |                |             |
| Predicted cumulative exacerbations      |                             |                |              |                                   |                |             |                                       |                |             |
| Moderate exacerbations                  | 5.940                       | 6.007          | -0.067       | 5.751                             | 5.739          | 0.011       | 5.797                                 | 5.846          | -0.049      |
| Severe exacerbations                    | 1.478                       | 1.615          | -0.137       | 1.414                             | 1.421          | -0.007      | 1.435                                 | 1.458          | -0.022      |
| Any moderate and/or severe exacerbation | 7.417                       | 7.622          | -0.205       | 7.165                             | 7.160          | 0.005       | 7.232                                 | 7.304          | -0.072      |
| Total LYs (discounted)                  | 9.643                       | 8.977          | 0.666        | 8.409                             | 7.916          | 0.493       | 9.725                                 | 9.121          | 0.604       |
| Total QALYs (discounted)                | 7.054                       | 6.411          | 0.643        | 5.982                             | 5.512          | 0.470       | 7.242                                 | 6.671          | 0.571       |
| <b>Costs</b>                            |                             |                |              |                                   |                |             |                                       |                |             |
| Maintenance                             | £7850                       | £9190          | -£1340       | £8871                             | £9784          | -£913       | £6296                                 | £7377          | -£1081      |
| Moderate exacerbation                   | £2502                       | £2544          | -£42         | £2484                             | £2492          | -£8         | £2427                                 | £2475          | -£48        |
| Severe exacerbation                     | £7054                       | £7552          | -£497        | £6955                             | £7008          | -£52        | £6823                                 | £6989          | -£166       |
| Pneumonia                               | £4285                       | £3955          | £331         | £3952                             | £3637          | £315        | £4545                                 | £4179          | £365        |
| Treatment                               | £5219                       | £3545          | £1675        | £4500                             | £3075          | £1425       | £5244                                 | £3568          | £1676       |
| Discontinuation                         | £405                        | £631           | -£227        | £370                              | £587           | -£217       | £435                                  | £688           | -£253       |
| <b>Total costs</b>                      | <b>£27 316</b>              | <b>£27 416</b> | <b>-£101</b> | <b>£27 133</b>                    | <b>£26 582</b> | <b>£551</b> | <b>£25 769</b>                        | <b>£25 276</b> | <b>£494</b> |
| ICER (cost/LY gained)                   | Dominant                    | Referent       | -            | £1118                             | Referent       | -           | £817                                  | Referent       | -           |
| ICER (cost/QALY gained)                 | Dominant                    | Referent       | -            | £1172                             | Referent       | -           | £864                                  | Referent       | -           |

EXT: extension; ITT: intent to treat; COPD: chronic obstructive pulmonary disease; FF: fluticasone furoate; UMEC: umeclidinium; VI: vilanterol; BUD: budesonide; FOR: formoterol; LY: life year; QALY: quality-adjusted life year; ICER: incremental cost-effectiveness ratio; FEV<sub>1</sub>: forced expiratory volume in 1 s. #: patients treated for up to 52 weeks; ¶: patients with FEV<sub>1</sub> percent predicted <50% at screening, with 24 weeks' follow-up; †: patients with ≥1 severe or ≥2 moderate exacerbations in the 12 months prior to randomisation.
